# Supplementary material for: Regucalcin expression profiles in veal calf testis: validation of histological and molecular tests to detect sex steroids illicit administration
Source: PeerJ. 2021 Feb 19;9:e10894. doi: 10.7717/peerj.10894 (PMC7899017; doi:10.7717/peerj.10894)
Supplement: Supplemental Information 1 [file peerj-09-10894-s001.xls]

## Sheet: IHC
Groups		Control Group										Estrogen Group										Androgen Group										Androgen + Estrogen Group
Sample ID		8	9	11	10	12	14	13	30	29	31	17	15	19	16	21	19	32	33	18	34	35	36	37	7	6	5	4	1	2	3	23	27	39	40	28	38	22	24	25	26
five randomly selected fields (reported as percentage of positive tissue area for each read)	1	0.0467	0.2596	0.0661	0.091	0.1287	0.054	0.0783	0.0843	0.0298	0.1024	0.0065	0.058	0.0107	0.0413	0.0549	0.0154	0.0065	0.0365	0.06	0.0076	0.0259	0.0224	0.0197	0.0074	0.0518	0.0264	0.0021	0.166	0.2383	0.044	0.0992	0.0102	0.0154	0.0212	0.0095	0.0245	0.1444	0.0296	0.0827	0.0186
	2	0.0622	0.2524	0.0471	0.1871	0.0944	0.0408	0.08	0.0789	0.0681	0.0802	0.0085	0.0289	0.0054	0.0217	0.0482	0.0412	0.0018	0.0234	0.0038	0.0045	0.0415	0.0453	0.0075	0.006	0.0336	0.0148	0.0017	0.117	0.0634	0.0329	0.1052	0.0377	0.0096	0.0533	0.0339	0.0338	0.1216	0.0119	0.0602	0.0512
	3	0.0696	0.3136	0.0665	0.1544	0.057	0.0362	0.0654	0.1004	0.0625	0.0661	0.0504	0.0163	0.007	0.0532	0.0212	0.0502	0.0064	0.016	0.0068	0.0175	0.04	0.0624	0.0045	0.002	0.0109	0.0356	0.033	0.0799	0.0994	0.0253	0.0649	0.0156	0.0275	0.0173	0.0121	0.0086	0.0531	0.0255	0.0504	0.0842
	4	0.0908	0.3128	0.0521	0.0974	0.0765	0.0804	0.0319	0.0885	0.0963	0.0547	0.0214	0.0406	0.0131	0.0337	0.047	0.0229	0.0042	0.0036	0.0293	0.0091	0.0361	0.0177	0.0119	0.0025	0.0508	0.0318	0.0101	0.086	0.1613	0.0243	0.0603	0.0277	0.0446	0.0204	0.0248	0.0256	0.0744	0.027	0.0775	0.1538
	5	0.138	0.3548	0.0567	0.0931	0.1442	0.0495	0.0472	0.0815	0.0699	0.1163	0.0279	0.075	0.0093	0.0271	0.036	0.0583	0.0049	0.0067	0.0096	0.0629	0.0536	0.0077	0.0177	0.0082	0.0206	0.0154	0.0615	0.1369	0.0398	0.0349	0.0512	0.0155	0.0786	0.0286	0.0493	0.0146	0.0396	0.0268	0.0714	0.0337
mean of five reads for each samples		0.08146	0.29864	0.0577	0.1246	0.10016	0.05218	0.06056	0.08672	0.06532	0.08394	0.02294	0.04376	0.0091	0.0354	0.04146	0.0376	0.00476	0.01724	0.0219	0.02032	0.03942	0.0311	0.01226	0.00522	0.03354	0.0248	0.02168	0.11716	0.12044	0.03228	0.07616	0.02134	0.03514	0.02816	0.02592	0.02142	0.08662	0.02416	0.06844	0.0683
				0.0268
				0.0714
				0.0512

## Sheet: PCR
Sample ID	PCR RGN/PPIA copy ratio (mean of three technical replicates)	Sample Groups
39	0.01376	Androgen+Estrogen
24	0.00779708	Androgen+Estrogen
28	0.00700019	Androgen+Estrogen
22	0.00669677	Androgen+Estrogen
38	0.00579001	Androgen+Estrogen
25	0.00510105	Androgen+Estrogen
40	0.00442199	Androgen+Estrogen
23	0.00381256	Androgen+Estrogen
26	0.00134461	Androgen+Estrogen
27	0.000731762	Androgen+Estrogen
1	0.057926	Androgen
35	0.0294377	Androgen
36	0.0257559	Androgen
37	0.0197866	Androgen
2	0.0164001	Androgen
5	0.0149209	Androgen
6	0.0138645	Androgen
4	0.0115238	Androgen
3	0.00961097	Androgen
7	0.0077206	Androgen
29	0.101961	Control
30	0.0829388	Control
10	0.0738478	Control
11	0.0613583	Control
31	0.0500758	Control
9	0.0468524	Control
14	0.0379837	Control
12	0.0366317	Control
13	0.0329271	Control
8	0.0209006	Control
15	0.0256001	Estrogen
34	0.018326	Estrogen
18	0.0156704	Estrogen
33	0.015142	Estrogen
21	0.0146354	Estrogen
16	0.0135664	Estrogen
19	0.0119393	Estrogen
32	0.0118036	Estrogen
20	0.00963523	Estrogen
17	0.00312278	Estrogen
